# Supplementary material for: Effects of the Species and Growth Stage on the Antioxidant and Antifungal Capacities, Polyphenol Contents, and Volatile Profiles of Bamboo Leaves
Source: MDPI journal article supplement (doi:10.3390/foods13030480), 2024-02-02
Supplement: s1 [file s1]

**Table S1.** The 30 unidentified VOCs in bamboo leaves.

| Compound | CAS#         | Formula | MW | RI     | RC (%) | CRC (%) |
|----------|--------------|---------|----|--------|--------|---------|
| 1        | unidentified | *       | 0  | 1088.8 | 0.16   | 27.9    |
| 2        | unidentified | *       | 0  | 1008   | 0.34   |         |
| 3        | unidentified | *       | 0  | 1036.5 | 0.94   |         |
| 4        | unidentified | *       | 0  | 1010.2 | 0.83   |         |
| 5        | unidentified | *       | 0  | 989.7  | 0.50   |         |
| 6        | unidentified | *       | 0  | 1033.5 | 0.58   |         |
| 7        | unidentified | *       | 0  | 1033.9 | 0.44   |         |
| 8        | unidentified | *       | 0  | 1088.4 | 0.39   |         |
| 9        | unidentified | *       | 0  | 870.1  | 0.12   |         |
| 10       | unidentified | *       | 0  | 938.2  | 1.31   |         |
| 11       | unidentified | *       | 0  | 919    | 0.10   |         |
| 12       | unidentified | *       | 0  | 912    | 0.18   |         |
| 13       | unidentified | *       | 0  | 779.1  | 1.07   |         |
| 14       | unidentified | *       | 0  | 781.8  | 0.82   |         |
| 15       | unidentified | *       | 0  | 775.7  | 0.78   |         |
| 16       | unidentified | *       | 0  | 761.4  | 0.64   |         |
| 17       | unidentified | *       | 0  | 787.1  | 0.35   |         |
| 18       | unidentified | *       | 0  | 741.8  | 1.30   |         |
| 19       | unidentified | *       | 0  | 721.4  | 1.13   |         |
| 20       | unidentified | *       | 0  | 717.6  | 0.79   |         |
| 21       | unidentified | *       | 0  | 713.8  | 0.20   |         |
| 22       | unidentified | *       | 0  | 732.4  | 0.36   |         |
| 23       | unidentified | *       | 0  | 741    | 0.28   |         |
| 24       | unidentified | *       | 0  | 740.3  | 0.63   |         |
| 25       | unidentified | *       | 0  | 693.2  | 3.06   |         |
| 26       | unidentified | *       | 0  | 544    | 1.48   |         |
| 27       | unidentified | *       | 0  | 473.6  | 4.36   |         |
| 28       | unidentified | *       | 0  | 440.5  | 3.29   |         |
| 29       | unidentified | *       | 0  | 530.3  | 1.24   |         |
| 30       | unidentified | *       | 0  | 1067.7 | 0.26   |         |

Note: \*, the formula is unknow; MW, Molecular weight; RI, Retention index; RC, Relative composition; CRC, Cumulative relative composition.

**Table S2.** The relative content of the unidentified compounds in four kinds of bamboo leaves.

| Compound | Annual <i>P. edulis</i>  | Biennial <i>P. edulis</i> | Annual <i>C. delicatus</i> | Biennial <i>C. delicatus</i> |
|----------|--------------------------|---------------------------|----------------------------|------------------------------|
| 1        | 0.20 ± 0.02 <sup>b</sup> | 0.07 ± 0.01 <sup>d</sup>  | 0.23 ± 0.01 <sup>a</sup>   | 0.15 ± 0.00 <sup>c</sup>     |
| 2        | 0.46 ± 0.03 <sup>a</sup> | 0.19 ± 0.00 <sup>d</sup>  | 0.31 ± 0.02 <sup>c</sup>   | 0.39 ± 0.02 <sup>b</sup>     |
| 3        | 1.18 ± 0.03 <sup>a</sup> | 0.81 ± 0.04 <sup>c</sup>  | 0.79 ± 0.08 <sup>c</sup>   | 0.98 ± 0.03 <sup>b</sup>     |
| 4        | 0.69 ± 0.05 <sup>b</sup> | 0.99 ± 0.05 <sup>a</sup>  | 0.68 ± 0.06 <sup>b</sup>   | 0.94 ± 0.01 <sup>a</sup>     |
| 5        | 0.29 ± 0.02 <sup>c</sup> | 1.17 ± 0.02 <sup>a</sup>  | 0.34 ± 0.01 <sup>b</sup>   | 0.20 ± 0.00 <sup>d</sup>     |
| 6        | 1.36 ± 0.16 <sup>a</sup> | 0.15 ± 0.05 <sup>c</sup>  | 0.39 ± 0.03 <sup>b</sup>   | 0.39 ± 0.01 <sup>b</sup>     |
| 7        | 0.38 ± 0.08 <sup>c</sup> | 0.16 ± 0.07 <sup>d</sup>  | 0.53 ± 0.06 <sup>b</sup>   | 0.68 ± 0.02 <sup>a</sup>     |
| 8        | 0.18 ± 0.01 <sup>d</sup> | 0.32 ± 0.01 <sup>c</sup>  | 0.47 ± 0.01 <sup>b</sup>   | 0.58 ± 0.01 <sup>a</sup>     |
| 9        | 0.22 ± 0.03 <sup>a</sup> | 0.18 ± 0.02 <sup>b</sup>  | 0.04 ± 0.01 <sup>c</sup>   | 0.05 ± 0.00 <sup>c</sup>     |
| 10       | 0.60 ± 0.03 <sup>c</sup> | 0.82 ± 0.07 <sup>b</sup>  | 1.85 ± 0.10 <sup>a</sup>   | 1.96 ± 0.01 <sup>a</sup>     |
| 11       | 0.11 ± 0.00 <sup>a</sup> | 0.12 ± 0.01 <sup>a</sup>  | 0.09 ± 0.01 <sup>b</sup>   | 0.08 ± 0.00 <sup>b</sup>     |
| 12       | 0.10 ± 0.01 <sup>b</sup> | 0.19 ± 0.01 <sup>b</sup>  | 0.34 ± 0.13 <sup>a</sup>   | 0.09 ± 0.00 <sup>b</sup>     |

|    |                           |                          |                          |                          |
|----|---------------------------|--------------------------|--------------------------|--------------------------|
| 13 | 1.79 ± 0.20 <sup>a</sup>  | 1.18 ± 0.07 <sup>b</sup> | 0.71 ± 0.03 <sup>c</sup> | 0.59 ± 0.01 <sup>c</sup> |
| 14 | 0.81 ± 0.04 <sup>b</sup>  | 0.59 ± 0.09 <sup>c</sup> | 0.92 ± 0.03 <sup>a</sup> | 0.93 ± 0.01 <sup>a</sup> |
| 15 | 0.71 ± 0.06 <sup>b</sup>  | 0.65 ± 0.07 <sup>b</sup> | 0.88 ± 0.02 <sup>a</sup> | 0.86 ± 0.02 <sup>a</sup> |
| 16 | 0.69 ± 0.04 <sup>b</sup>  | 0.34 ± 0.03 <sup>c</sup> | 0.67 ± 0.03 <sup>b</sup> | 0.82 ± 0.01 <sup>a</sup> |
| 17 | 0.31 ± 0.04 <sup>b</sup>  | 0.62 ± 0.06 <sup>a</sup> | 0.23 ± 0.03 <sup>b</sup> | 0.25 ± 0.01 <sup>b</sup> |
| 18 | 1.86 ± 0.07 <sup>a</sup>  | 0.79 ± 0.06 <sup>c</sup> | 1.24 ± 0.03 <sup>b</sup> | 1.29 ± 0.01 <sup>b</sup> |
| 19 | 0.50 ± 0.00 <sup>d</sup>  | 1.37 ± 0.03 <sup>b</sup> | 1.15 ± 0.04 <sup>c</sup> | 1.51 ± 0.02 <sup>a</sup> |
| 20 | 1.35 ± 0.11 <sup>a</sup>  | 0.58 ± 0.02 <sup>c</sup> | 0.93 ± 0.06 <sup>b</sup> | 0.31 ± 0.02 <sup>d</sup> |
| 21 | 0.22 ± 0.01 <sup>a</sup>  | 0.22 ± 0.00 <sup>a</sup> | 0.19 ± 0.01 <sup>b</sup> | 0.19 ± 0.00 <sup>b</sup> |
| 22 | 0.13 ± 0.02 <sup>c</sup>  | 0.46 ± 0.02 <sup>a</sup> | 0.49 ± 0.04 <sup>a</sup> | 0.36 ± 0.01 <sup>b</sup> |
| 23 | 0.27 ± 0.03 <sup>b</sup>  | 0.51 ± 0.07 <sup>a</sup> | 0.27 ± 0.04 <sup>b</sup> | 0.07 ± 0.01 <sup>c</sup> |
| 24 | 0.69 ± 0.02 <sup>b</sup>  | 0.83 ± 0.04 <sup>a</sup> | 0.54 ± 0.04 <sup>c</sup> | 0.47 ± 0.05 <sup>c</sup> |
| 25 | 3.20 ± 0.40 <sup>b</sup>  | 1.98 ± 0.10 <sup>c</sup> | 2.25 ± 0.11 <sup>c</sup> | 4.71 ± 0.08 <sup>a</sup> |
| 26 | 2.17 ± 0.13 <sup>a</sup>  | 0.86 ± 0.01 <sup>d</sup> | 1.78 ± 0.10 <sup>b</sup> | 1.12 ± 0.03 <sup>c</sup> |
| 27 | 4.47 ± 0.33 <sup>ab</sup> | 4.19 ± 0.25 <sup>b</sup> | 4.08 ± 0.14 <sup>b</sup> | 4.68 ± 0.09 <sup>a</sup> |
| 28 | 3.92 ± 0.21 <sup>a</sup>  | 3.74 ± 0.08 <sup>a</sup> | 3.40 ± 0.20 <sup>b</sup> | 2.15 ± 0.04 <sup>c</sup> |
| 29 | 1.40 ± 0.05 <sup>a</sup>  | 1.30 ± 0.01 <sup>b</sup> | 1.01 ± 0.05 <sup>c</sup> | 1.24 ± 0.01 <sup>b</sup> |
| 30 | 0.15 ± 0.01 <sup>c</sup>  | 0.20 ± 0.02 <sup>b</sup> | 0.35 ± 0.03 <sup>a</sup> | 0.33 ± 0.01 <sup>a</sup> |

---

Data are expressed as means ± SD. The small letter superscripted in each column indicates a significant difference ( $p < 0.05$ ,  $n = 3$ ).
